# Supplementary material for: Sustainable Continuity of Cultural Heritage: An Approach for Studying Architectural Identity Using Typo-Morphology Analysis and Perception Survey
Source: Preprints.org preprint supplement (doi:10.20944/preprints202305.1162.v1), 2023-05-16
Supplement: Supplementary file 1 [file supplementary]

**Appendix 2. Frequency of variables of the questionnaire**
