# Supplementary material for: Sustainable Continuity of Cultural Heritage: An Approach for Studying Architectural Identity Using Typo-Morphology Analysis and Perception Survey
Source: Preprints.org preprint supplement (doi:10.20944/preprints202305.1162.v1), 2023-05-16
Supplement: Supplementary file 2 [file Appendix 1. Questionnaire form.docx]

**Ministry of Higher Education and Scientific Research**

**Salahaddin University-Erbil**

**College of Engineering**

**Architecture Department**

**Questionnaire**

Dear sir / madam...

This questionnaire is prepared as part of the requirements for obtaining a Ph.D. degree in architecture, It is conducted in the architecture department, college of engineering, Salahaddin university-Erbil.

The aim of this questionnaire is to ask the experts in the field of architecture about:

1. The essence and potentiality of the architecture identity as a continuous process through the tensional relationship between inheritance and creation of architectural identity.
2. Elements associated to cultural heritage that influence on the continuity of architectural identity in the houses of Erbil city (1900-2020).

Your contribution and allow your valuable time for us is highly appreciated. This questionnaire is used for scientific purposes.

Ph.D candidate: **Binyad Maruf Abdulkadir Khaznadar (Lecturer)**

Email: [binyad.khaznadar@su.edu.krd](mailto:binyad.khaznadar@su.edu.krd)

Mobile: 07504459757

Supervisor: **Dr.** **Salahaddin Yasen Baper (Assistant Professor)**

**General information:**

| **Academic qualification** | Bachelor (B.Sc.) | Master degree (M.Sc.) | Ph.D. degree | Others, specify please |
| --- | --- | --- | --- | --- |
|  |  |  |  |

| **Working sector** | University | Government sector | Private sector | Others, specify please |
| --- | --- | --- | --- | --- |
|  |  |  |  |

| **Age** | 18-24 | 24-39 | 40-60 | 60 and above |
| --- | --- | --- | --- | --- |
|  |  |  |  |

**Note:**

1. The selection fields in this questionnaire are arranged according to a five point Likert type scale.
2. Please tick (/) just one cell in each description.

**Part one: The essence and potentiality of the architecture identity as a continuous process through the tensional relationship between inheritance and creation of architectural identity.**

| **Code** | **Question** | **Totally agree** | **Agree** | **Neutral** | **Disagree** | **Totally Disagree** |
| --- | --- | --- | --- | --- | --- | --- |
| X1-1 | Architectural identity is a static object that inherited from the past |  |  |  |  |  |
| X1-2 | Architectural identity could be created at any time |  |  |  |  |  |
| X1-3 | Architectural identity is the result of the tensional relationship between keeping past identities and creating new identities |  |  |  |  |  |
| X1-4 | Factors affecting the process of continuity in architectural identity vary in different cultures and contexts. |  |  |  |  |  |
| X1-5 | (Time) is an effective factor in the process of continuity of architectural identity. |  |  |  |  |  |
| X1-6 | (Place) is an effective factor in the process of continuity of architectural identity. |  |  |  |  |  |
| X1-7 | The level of identity representation, including (architecture, urban, planning, and region) influences on the process of continuity of architectural identity. |  |  |  |  |  |
| X1-8 | Functionality is more representing architectural identity. |  |  |  |  |  |
| X1-9 | Form as visual aspect is more reflecting architectural identity. |  |  |  |  |  |
| X1-10 | Non-physical aspects related to build environments and contexts mostly represent identities. |  |  |  |  |  |

**Part two: The influence of (cultural heritage) elements on the (continuity of architectural identity) in houses of Erbil city (1900-2020)**

| **Code** | **Question** | | **Totally agree** | **Agree** | **Neutral** | **Disagree** | **Totally Disagree** |
| --- | --- | --- | --- | --- | --- | --- | --- |
| **2-Physical factors**   - 1. **Factors related to plan layout** | | |
| X2-1-1 | | The setback and the relationship between house mass and street (public domain) influences on the continuity of architectural identity. |  |  |  |  |  |
| X2-1-2 | | The relationship between house’s ground level and street level influences on the continuity of architectural identity. |  |  |  |  |  |
| X2-1-3 | | The relationship between indoor and outdoor spaces of the house influences on the continuity of architectural identity. |  |  |  |  |  |
| X2-1-4 | | The enclosure or space openness towards inside and outside influences on the continuity of architectural identity. |  |  |  |  |  |
| X2-1-5 | | Location of the house within the plot of the land influences on the continuity of architectural identity. |  |  |  |  |  |
| X2-1-6 | | Ratio of house to open space area influences on the continuity of architectural identity. |  |  |  |  |  |
| X2-1-7 | | Space configuration inside the house influences on the continuity of architectural identity. |  |  |  |  |  |
| X2-1-8 | | Number of entrances in the house influences on the continuity of architectural identity. |  |  |  |  |  |
| X2-1-9 | | Direct access from outside to specific spaces inside the house like (guest room, living room, kitchen…etc.) influences on the continuity of architectural identity. |  |  |  |  |  |
| X2-1-10 | | Type of circulation inside the house influences on the continuity of architectural identity. |  |  |  |  |  |
| X2-1-11 | | Location of the staircase inside and outside the house influences on the continuity of architectural identity. |  |  |  |  |  |
| X2-1-12 | | Defining functional zones inside the house influences on the continuity of architectural identity. |  |  |  |  |  |
| X2-1-13 | | Location of functional zones inside the house influences on the continuity of architectural identity. |  |  |  |  |  |
| X2-1-14 | | Diversity of functions inside the house influences on the continuity of architectural identity. |  |  |  |  |  |
| X2-1-15 | | Hierarchy of spaces in the house and the availability of a dominant space influences on the continuity of architectural identity. |  |  |  |  |  |
| X2-1-16 | | The position of the dominant space in the house influences on the continuity of architectural identity. |  |  |  |  |  |
| X2-1-17 | | Variety of spaces located in house’s front facade influences on the continuity of architectural identity. |  |  |  |  |  |
| X2-1-18 | | Shape of window in the plan layout influences on the continuity of architectural identity. |  |  |  |  |  |
| X2-1-19 | | The ratio of solid (wall) to openings (windows) of the space in plan layout influences on the continuity of architectural identity. |  |  |  |  |  |
| X2-1-20 | | The location of the main entrance within the façade influences on the continuity of architectural identity. |  |  |  |  |  |
| X2-1-21 | | Shape of the entrance in the plan layout influences on the continuity of architectural identity. |  |  |  |  |  |
| X2-1-22 | | Visibility of spaces from outside influences on the continuity of architectural identity. |  |  |  |  |  |
| X2-1-23 | | Spaces those are mostly visible from outside influences on the continuity of architectural identity. |  |  |  |  |  |
| **2-2 Factors related to façade** | | |  |  |  |  |  |
| X2-2-1 | | The height of the house influences on the continuity of architectural identity. |  |  |  |  |  |
| X2-2-2 | | The regularity of mass influences on the continuity of architectural identity. |  |  |  |  |  |
| X2-2-3 | | Articulation in façade influences on the continuity of architectural identity. |  |  |  |  |  |
| X2-2-4 | | The symmetrical arrangement of façade elements influences on the continuity of architectural identity. |  |  |  |  |  |
| X2-2-5 | | The rhythmical arrangements of the elements in the façade influences on the continuity of architectural identity. |  |  |  |  |  |
| X2-2-6 | | The multi-layering of façade influences on the continuity of architectural identity. |  |  |  |  |  |
| X2-2-7 | | The unity of the façade influences on the continuity of architectural identity. |  |  |  |  |  |
| X2-2-8 | | Ratio of solid to void in the façade influences on the continuity of architectural identity. |  |  |  |  |  |
| X2-2-9 | | Using various elements in the facade influences on the continuity of architectural identity. |  |  |  |  |  |
| X2-2-10 | | The height of window from the ground level influences on the continuity of architectural identity. |  |  |  |  |  |
| X2-2-11 | | Size of the window influences on the continuity of architectural identity. |  |  |  |  |  |
| X2-2-12 | | The element being recessed or eclipsed regarding the façade line influences on the continuity of architectural identity. |  |  |  |  |  |
| X2-2-13 | | Formal typologies of façade elements influences on the continuity of architectural identity. |  |  |  |  |  |
| X2-2-14 | | Finishing materials used in the façade influences on the continuity of architectural identity. |  |  |  |  |  |
| X2-2-15 | | Using different colours in the façade influences on the continuity of architectural identity. |  |  |  |  |  |
| X2-2-16 | | Using hybrid architectural styles in the façade influences on the continuity of architectural identity. |  |  |  |  |  |
| 1. **Socio-cultural factors** | | |  |  |  |  |  |
| X3-1 | The need for a space that provides psychological comfort to its occupants influences on the continuity of architectural identity. | |  |  |  |  |  |
| X3-2 | Feeling safe within the house environment influences on the continuity of architectural identity. | |  |  |  |  |  |
| X3-3 | Sense of territoriality in the house influences on the continuity of architectural identity. | |  |  |  |  |  |
| X3-4 | Sense of belonging to place influences on the continuity of architectural identity. | |  |  |  |  |  |
| X3-5 | Self-identity influences on the continuity of architectural identity. | |  |  |  |  |  |
| X3-6 | Separation between genders inside the house influences on the continuity of architectural identity. | |  |  |  |  |  |
| X3-7 | Separation of strangers from family members inside the house influences on the continuity of architectural identity. | |  |  |  |  |  |
| X3-8 | Cultural shifts influences on the continuity of architectural identity. | |  |  |  |  |  |
| X3-9 | Change in cultural values and believes influences on the continuity of architectural identity. | |  |  |  |  |  |
| X3-10 | Change in way of life influences on the continuity of architectural identity. | |  |  |  |  |  |
| X3-11 | Change in social relationships influences on the continuity of architectural identity. | |  |  |  |  |  |
| X3-12 | Family size influences on continuity of architectural identity. | |  |  |  |  |  |
| X3-13 | Religious believes influences on the continuity of architectural identity. | |  |  |  |  |  |
| 1. **Factors of sustainable development** | | |  |  |  |  |  |
| X4-1 | Change in construction methods influences on the continuity of architectural identity. | |  |  |  |  |  |
| X4-2 | The invention of new building materials influences on the continuity of architectural identity. | |  |  |  |  |  |
| X4-3 | Using photovoltaic panels in houses influences on the continuity of architectural identity. | |  |  |  |  |  |
| X4-4 | Using thermal insulation materials for façade coating influences on the continuity of architectural identity. | |  |  |  |  |  |
| X4-5 | Increasing window size by using multi-layered glass influences on the continuity of architectural identity. | |  |  |  |  |  |
| X4-6 | Change in local authority regulations influences on the continuity of architectural identity. | |  |  |  |  |  |
| X4-7 | Family income influences on the continuity of architectural identity. | |  |  |  |  |  |
