# Supplementary material for: Sustainable Continuity of Cultural Heritage: An Approach for Studying Architectural Identity Using Typo-Morphology Analysis and Perception Survey
Source: Preprints.org preprint supplement (doi:10.20944/preprints202305.1162.v1), 2023-05-16
Supplement: Supplementary file 2 [file supplementary]

Archive with 3 entries (3 files):
- Appendix 1. Questionnaire form.docx
- Appendix 1. Questionnaire form.pdf
- Appendix 2. Frequency of variables of the questionnaire.docx
